# Supplementary material for: A highly selective A–π–A “turn-on” fluorescent probe for hypochlorite in tap water
Source: Royal Society of Chemistry journal article supplement (doi:10.1039/d2nj01792j), 2022-01-01
Supplement: d2nj01792j1.pdf [file d2nj01792j1.pdf]

## Supporting Information

### A highly selective A- $\pi$ -A' "turn-on" fluorescent probe for hypochlorite in tap

#### water

Wenshuai Cheng, Chunping Ren, Shuang Liu, Wenshuo Jiang, Xiuna Zhu, Wenxuan Jia, Jianbo Cheng and Zhenbo Liu\*

College of Chemistry and Chemical Engineering, Yantai University, Yantai 264005,  
People's Republic of China

\*Corresponding author: [zhenboliu@foxmail.com](mailto:zhenboliu@foxmail.com)

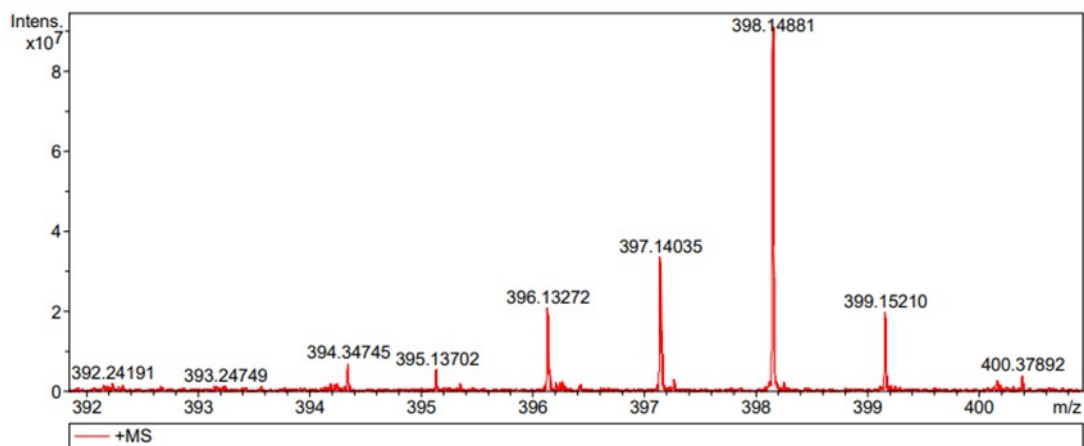

**Fig. S1** MS data of **BODIPY-CHO**

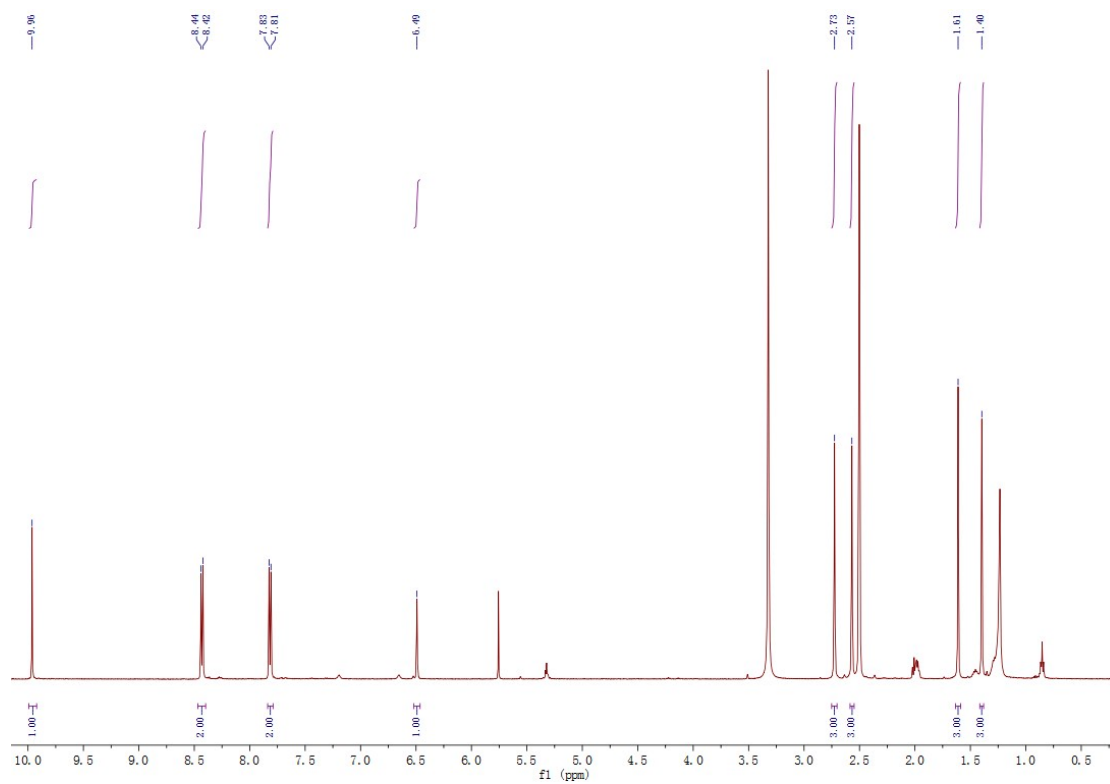

**Fig. S2** <sup>1</sup>H-NMR data of **BODIPY-CHO**

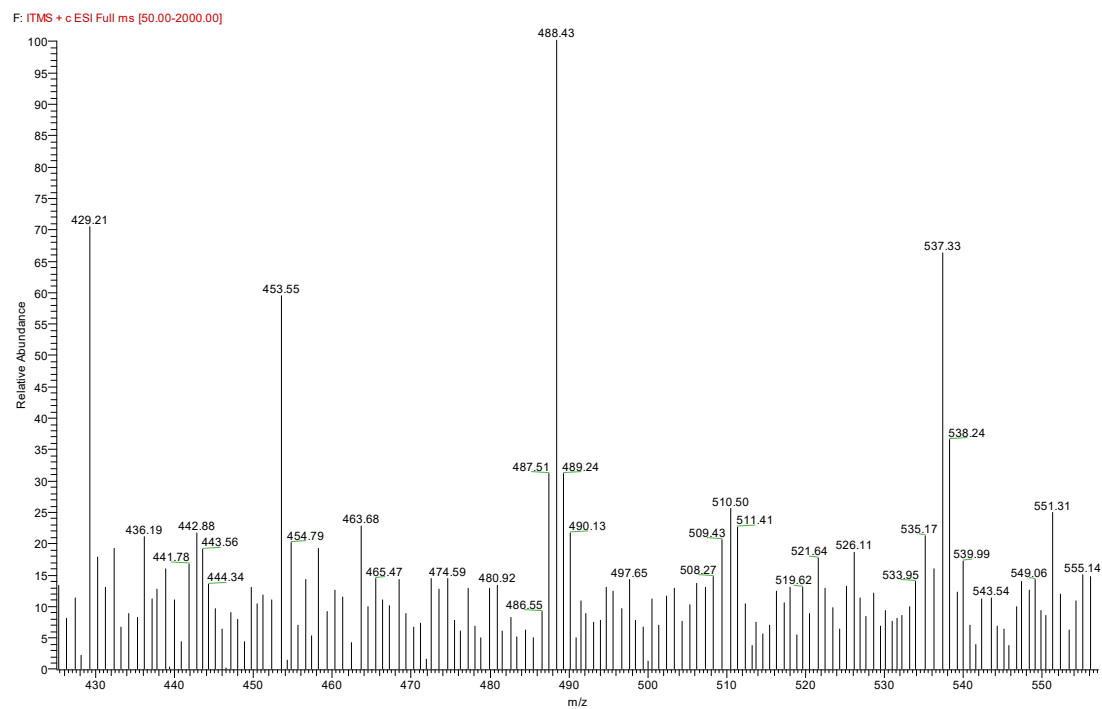

**Fig. S3** MS data of the probe **BON**

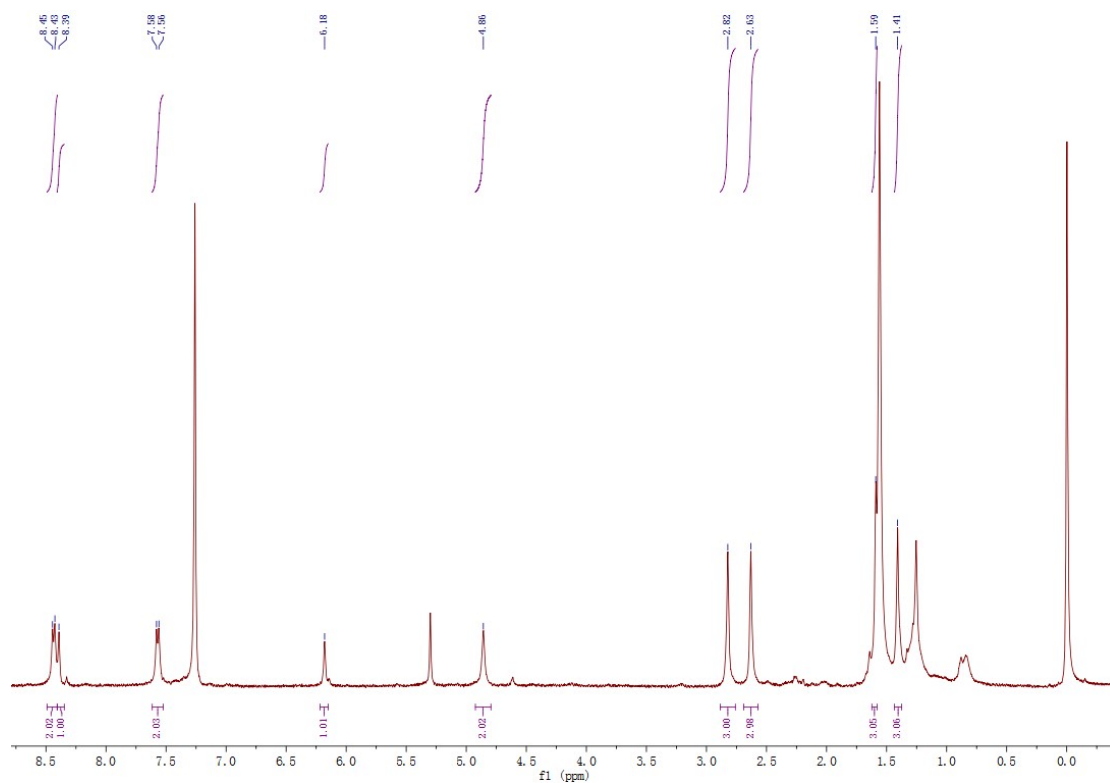

**Fig. S4**  $^1\text{H-NMR}$  data of the probe **BON**

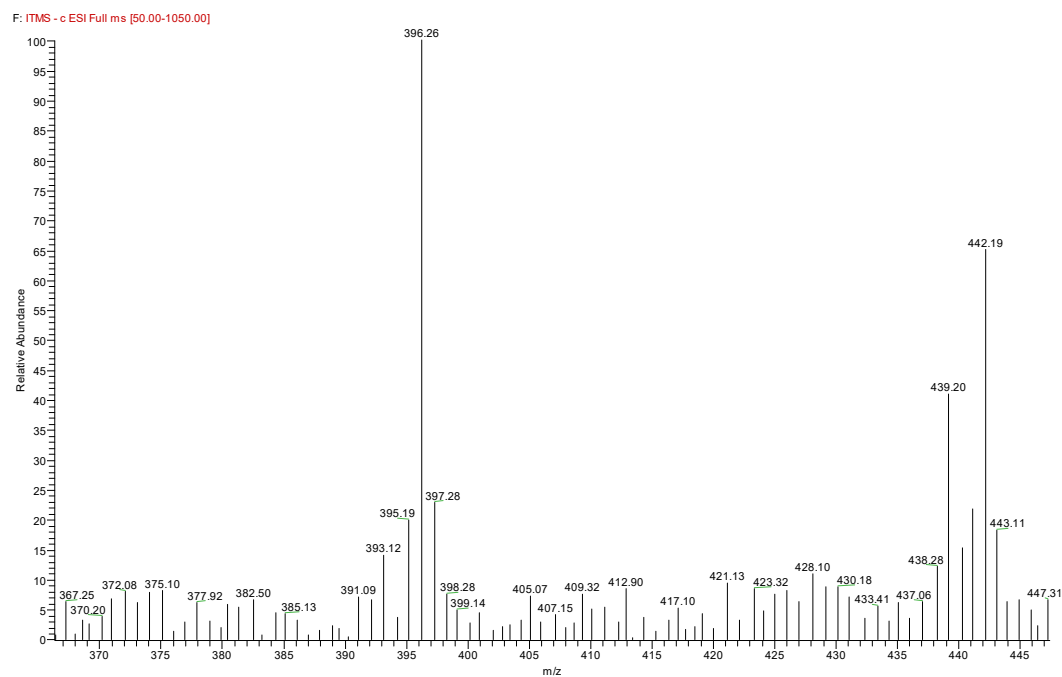

**Fig. S5** MS data of **BON** with  $\text{ClO}^-$

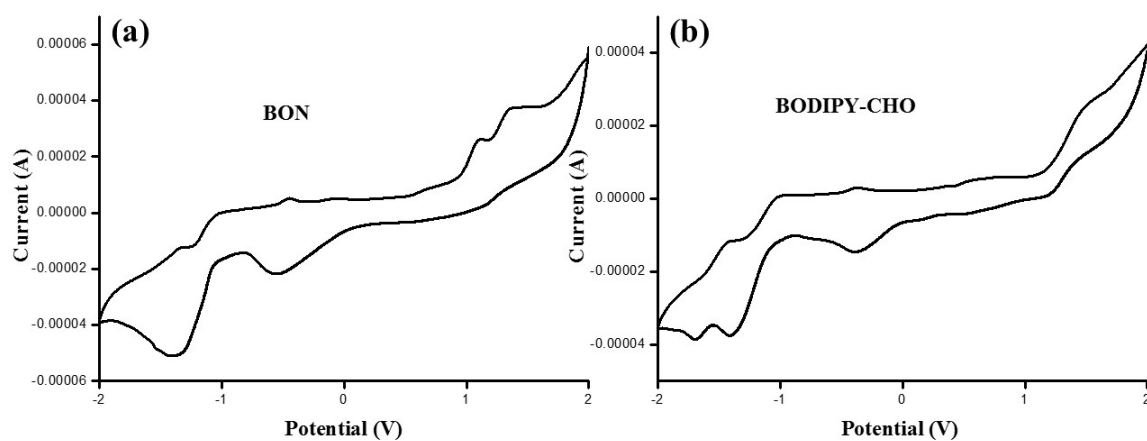

**Fig. S6** Cyclic voltammograms of 1 mM **BON** (a) and **BODIPY-CHO** (b) measured in dichloromethane solution, containing 0.1 M tetrabutylammonium hexafluorophosphate ( $\text{TBAPF}_6$ ) as the supporting electrolyte at room temperature. The glassy carbon electrode as the working electrode. The  $\text{Ag}/\text{Ag}^+$  electrode as the reference electrode. The platinum wire as the counter electrode.

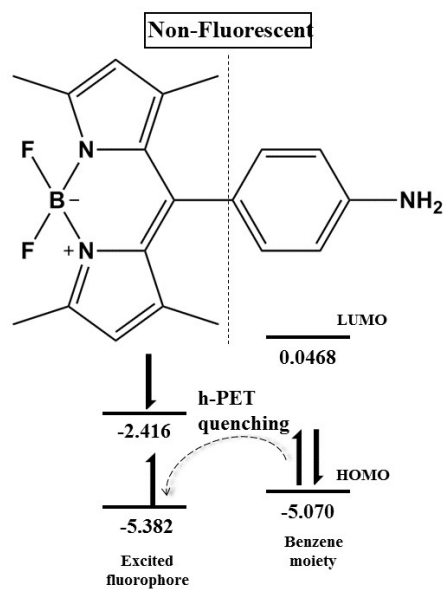

**Fig. S7** Photoinduced electron transfer (PET) mechanism between BODIPY moiety and phenylamino.

**Tab. S1** Quantum yields of **BODIPY-CHO** in different solvents.

| Solvents   | EtOH | DCM   | Toluene |
|------------|------|-------|---------|
| ( $\phi$ ) | 8.9% | 21.4% | 35.6%   |

**Tab. S2.** Electrochemical data acquired at 50 mV/s, and HOMO-LUMO Gaps determined from spectroscopy of dyes **BON**, **BODIPY-CHO**.<sup>a</sup>

| dye        | $E_{\text{red}}^{\text{onset}}$ | $E_{\text{ox}}^{\text{onset}}$ | LUMO   | HOMO   | $E_{\text{g}}^{\text{e}}$ |
|------------|---------------------------------|--------------------------------|--------|--------|---------------------------|
|            | (V)                             | (V)                            | (eV)   | (eV)   | (eV)                      |
| BON        | -1.383                          | 1.356                          | -3.027 | -5.766 | 2.739                     |
| BODIPY-CHO | -1.404                          | 1.523                          | -3.006 | -5.906 | 2.927                     |

<sup>a</sup>  $E_{\text{red}}^{\text{onset}}$  = the onset reduction potentials;  $E_{\text{ox}}^{\text{onset}}$  = the onset oxidation potentials;  $E_{\text{LUMO}} = -e(E_{\text{red}}^{\text{onset}} - E_{\text{Fc}/\text{Fc}^+} + 4.80)$ ;

By assuming the energy level of ferrocene/ferrocenium ( $\text{Fc}/\text{Fc}^+$ ) to be 4.8 eV below the vacuum level<sup>1</sup>,  $E_{\text{Fc}/\text{Fc}^+}$  is

the potential of  $\text{Fc}/\text{Fc}^+$  against the  $\text{Ag}/\text{Ag}^+$  reference electrode which is measured to be 0.39 eV<sup>2</sup>;  $E_{\text{HOMO}} = -$

$e(E_{\text{ox}}^{\text{onset}} - E_{\text{Fc}/\text{Fc}^+} + 4.80)$ ;  $E_{\text{g}}^{\text{e}}$  = bandgap, obtained from the intercept of the electrochemical data;  $E_{\text{g}}^{\text{e}} = E_{\text{LUMO}} -$

$E_{\text{HOMO}}$ .

**Tab. S3** Results of spiked recovery of hypochlorite in tap water

| <b>Water samples</b> | <b>ClO<sup>-</sup> spiked (μM)</b> | <b>Recovered (μM)</b> | <b>Recovery (%)</b> |
|----------------------|------------------------------------|-----------------------|---------------------|
| Tap water sample 1   | 1                                  | 1.8±0.02              | 91.0                |
| Tap water sample 2   | 2                                  | 2.7±0.01              | 90.5                |
| Tap water sample 3   | 3                                  | 3.7±0.02              | 93.6                |



## References

1. M. Soltani, R. Minakar, H. R. Memarian and H. Sabzyan, *J. Phys. Chem. A*, 2019, **123**, 2820-2830.
2. M. X. Lu, W. Wang, L. Y. Liang, S. H. Yan and Q. D. Ling, *Polym. Bull.*, 2017, **74**, 603-614.
